# Supplementary material for: Characterisation of RSV Fusion Proteins from South African Patients with RSV Disease, 2019 to 2020
Source: MDPI journal article supplement (doi:10.3390/v14112321), 2022-10-22
Supplement: s1 [file s1]

## Supplementary table

**Table S1.** Summary of F gene sequence data from this study that are available on the GISAID database.

| Shortened Sequence name (*Tree) | Full Sequence name (GISAID)        | Accession number | Year of detection |
|---------------------------------|------------------------------------|------------------|-------------------|
| RSV25/RSA/2019                  | hRSV/A/South_Africa/NCV280-25/2019 | EPI_ISL_14204587 | 2019              |
| RSV45/RSA/2019                  | hRSV/A/South_Africa/NCV496-45/2019 | EPI_ISL_14204598 | 2019              |
| RSV47/RSA/2019                  | hRSV/A/South_Africa/NCV498-47/2019 | EPI_ISL_14204599 | 2019              |
| RSV48/RSA/2019                  | hRSV/A/South_Africa/NCV499-48/2019 | EPI_ISL_14204600 | 2019              |
| RSV52/RSA/2019                  | hRSV/A/South_Africa/NCV500-52/2019 | EPI_ISL_14204601 | 2019              |
| RSV2/RSA/2020                   | hRSV/A/South_Africa/p5-2/2020      | EPI_ISL_14171764 | 2020              |
| RSV3/RSA/2020                   | hRSV/A/South_Africa/p6-3/2020      | EPI_ISL_14172564 | 2020              |
| RSV5/RSA/2020                   | hRSV/A/South_Africa/p7-5/2020      | EPI_ISL_14173335 | 2020              |
| RSV8/RSA/2020                   | hRSV/A/South_Africa/p8-8/2020      | EPI_ISL_14174342 | 2020              |
| RSV9/RSA/2020                   | hRSV/A/South_Africa/p9-9/2020      | EPI_ISL_14204579 | 2020              |
| RSV10/RSA/2020                  | hRSV/A/South_Africa/NCV273-10/2020 | EPI_ISL_14204580 | 2020              |
| RSV11/RSA/2020                  | hRSV/A/South_Africa/NCV274-11/2020 | EPI_ISL_14204581 | 2020              |
| RSV12/RSA/2020                  | hRSV/A/South_Africa/NCV275-12/2020 | EPI_ISL_14204582 | 2020              |
| RSV13/RSA/2020                  | hRSV/A/South_Africa/NCV276-13/2020 | EPI_ISL_14204583 | 2020              |
| RSV20/RSA/2020                  | hRSV/A/South_Africa/NCV277-20/2020 | EPI_ISL_14204584 | 2020              |
| RSV22/RSA/2020                  | hRSV/A/South_Africa/NCV278-22/2020 | EPI_ISL_14204585 | 2020              |
| RSV24/RSA/2020                  | hRSV/A/South_Africa/NCV279-24/2020 | EPI_ISL_14204586 | 2020              |
| RSV26/RSA/2020                  | hRSV/A/South_Africa/NCV317-26/2020 | EPI_ISL_14204588 | 2020              |
| RSV27/RSA/2020                  | hRSV/A/South_Africa/NCV318-27/2020 | EPI_ISL_14204589 | 2020              |
| RSV31/RSA/2020                  | hRSV/A/South_Africa/NCV321-31/2020 | EPI_ISL_14204590 | 2020              |
| RSV32/RSA/2020                  | hRSV/A/South_Africa/NCV322-32/2020 | EPI_ISL_14204591 | 2020              |
| RSV36/RSA/2020                  | hRSV/A/South_Africa/NCV323-36/2020 | EPI_ISL_14204592 | 2020              |
| RSV37/RSA/2020                  | hRSV/A/South_Africa/NCV324-37/2020 | EPI_ISL_14204593 | 2020              |
| RSV39/RSA/2020                  | hRSV/A/South_Africa/NCV325-39/2020 | EPI_ISL_14204594 | 2020              |
| RSV42/RSA/2020                  | hRSV/A/South_Africa/NCV327-42/2020 | EPI_ISL_14204595 | 2020              |
| RSV43/RSA/2020                  | hRSV/A/South_Africa/NCV328-43/2021 | EPI_ISL_14204596 | 2020              |
| RSV44/RSA/2020                  | hRSV/A/South_Africa/NCV495-44/2020 | EPI_ISL_14204597 | 2020              |
| RSV59/RSA/2020                  | hRSV/A/South_Africa/NCV501-59/2020 | EPI_ISL_14204602 | 2020              |

\*Partial F gene sequences from 2 cases were not uploaded to GISAID
